# Supplementary material for: The answer is blowing in the wind: free flying honeybees can integrate visual and mechano-sensory inputs for making complex foraging decisions
Source: Oxford University Press journal article supplement (doi:10.1242/jeb.142679), 2016-01-01
Supplement: jeb142679supp.pdf [file jeb142679supp.pdf]

**Table S1. Colorimetric specification of target stimuli**

Honeybee photoreceptor contrasts, relative intensity and colour distances of the ‘yellow’ and ‘blue’ stimuli considering two models of opponent processing showing stimuli were saliently different in colour for bee perception (Chittka, 1992; Backhaus, 1991; Avarguès-Weber et al., 2014); see Fig. 1 in main manuscript. Reflectance spectra from the coloured targets and background were measured between 300 and 800 nm at 0.7 nm intervals with a USB 2000 spectrophotometer (Ocean Optics, USA) connected to a deuterium-halogen DH-200 light source (Ocean Optics, USA) and a probe mounted at 45° by means of a bifurcated 200 μm optical fibre (Ocean Optics, USA). Reflectance profiles were measured relative to an lambertian, PTF WS-1 reflectance standard (Ocean Optics, USA). Ten readings, each one consisting of the average of 5 scans, were recorded for the targets and backgrounds and subsequently processed for obtaining mean reflectance profiles between 300 and 650 nm at 10 nm intervals (Fig. 1B, main manuscript) using custom-written code for Matlab release 2014b (The Mathworks, USA).

|                                    | ‘yellow’                   | ‘blue’      |
|------------------------------------|----------------------------|-------------|
| UV-Receptor                        | 0.793                      | 0.877       |
| Blue-receptor                      | 0.666                      | 0.885       |
| Green-receptor                     | 0.786                      | 0.618       |
| Colour distance<br>(COC units)     | bckg: 3.45<br>blue: 7.00   | bckg: 4.56  |
| Colour distance<br>(Hexagon units) | bckg: 0.123<br>blue: 0.263 | bckg: 0.263 |

## References

- Chittka, L. The colour hexagon: a chromaticity diagram based on photoreceptor excitations as a generalized representation of colour opponency. *J Comp Physiol A* **170**, 533–543 (1992).
- Backhaus, W. Color opponent coding in the visual system of the honeybee. *Vision Res* **31**, 1381–1397 (1991).
- Avarguès-Weber, A., d’Amaro, D., Metzler, M. & A.G., D. Conceptualization of relative size by honeybees. *Front Behav Neurosci* **8** (2014).
